# New mathematical modelling tools for co-culture experiments: when do we need to explicitly account for signalling molecules?

Wang Jin <sup>a,\*</sup>, Haolu Wang <sup>b,c</sup>, Xiaowen Liang <sup>b,c</sup>,

Michael S Roberts <sup>b</sup>, Matthew J Simpson <sup>a</sup>

<sup>a</sup>*School of Mathematical Sciences, Queensland University of Technology (QUT),  
Brisbane, Australia*

<sup>b</sup>*The University of Queensland Diamantina Institute, The University of  
Queensland, Woolloongabba, Queensland, Australia*

<sup>c</sup>*Gallipoli Medical Research Institute, Greenslopes Private Hospital, Greenslopes,  
Queensland, Australia*

---

## Abstract

Mathematical models are often applied to describe cell migration regulated by diffusible signalling molecules. A typical feature of these models is that the spatial and temporal distribution of the signalling molecule density is reported by solving a reaction–diffusion equation. However, the spatial and temporal distributions of such signalling molecules are not often reported or observed experimentally. This leads to a mismatch between the amount of experimental data available and the complexity of the mathematical model used to simulate the experiment. To address this mismatch, we develop a discrete model of cell migration that can be used to describe a new suite of co-culture cell migration assays involving two interacting subpopulations of cells. In this model, the migration of cells from one subpopulation is regulated by the presence of signalling molecules that are secreted by the other subpopulation of cells. The spatial and temporal distribution of the signalling

molecules is governed by a discrete conservation statement that is related to a reaction–diffusion equation. We simplify the model by invoking a steady state assumption for the diffusible molecules, leading to a reduced discrete model allowing us to describe how one subpopulation of cells stimulates the migration of the other subpopulation of cells without explicitly dealing with the diffusible molecules. We provide additional mathematical insight into these two stochastic models by deriving continuum limit partial differential equation descriptions of both models. To understand the conditions under which the reduced model is a good approximation of the full model, we apply both models to mimic a set of novel co–culture assays and we systematically explore how well the reduced model approximates the full model as a function of the model parameters.

*Key words:* Chemokinesis, Chemotaxis, Stochastic simulation, Continuum model, Cell migration, Diffusible molecules.

---

---

\* Corresponding author. E-mail: w1.jin@qut.edu.au

## 1 Introduction

2 Random motility is widely recognised as the key mechanism driving *in vitro*  
3 cell migration in highly idealised homogeneous environments (Huang et al.  
4 2005; Treloar et al. 2014). However, in more realistic situations, cell migra-  
5 tion is often regulated by external signals such as diffusible molecules. Cell  
6 migration regulated by signalling molecules plays an important role in embry-  
7 onic development (Behar et al. 1996; Simpson et al. 2006), cancer metastasis  
8 (Kucia et al. 2004; Müller et al. 2001) and wound healing (Flegg et al. 2015;  
9 Pettet et al. 1996). In these situations, cell migration is often activated by sig-  
10 nalling molecules binding to receptors on the cell surface (Yoon et al. 2016).  
11 Signalling molecules can be present in the environment or secreted by other  
12 cells (Luster 1998; Wright et al. 2005). In Figure 1(a) we show an example of  
13 such a system where a signalling molecule called stromal cell-derived factor 1  
14 (SDF-1) binds to the C-X-C motif chemokine receptor 4 (CXCR4) expressed  
15 on the surface of a mesenchymal stem cell (MSC). This process can regulate  
16 migration of MSCs (Yoon et al. 2016).

17 There are two key mechanisms that give rise to cell migration regulated by  
18 diffusible signalling molecules: (i) *chemokinesis* is where undirected cell migra-  
19 tion is regulated by the local density of a particular signalling molecule (Liu  
20 and Klominek 2004; Cai et al. 2006); and (ii) *chemotaxis* is where the direction  
21 of cell migration is influenced by the spatial gradient of a signalling molecule  
22 (Keller and Segel 1971). The primary difference between chemokinesis and  
23 chemotaxis is that, at the individual level, chemokinesis influences the rate of  
24 undirected random cell movement without explicitly introducing a directional  
25 bias, whereas chemotaxis explicitly stimulates directional cell movement (Cai  
26 et al. 2006). Various experimental methods, such as transwell assays (Chen et  
27 al. 2006), microfluidic devices (Son et al. 2015), chemokinesis and chemotaxis  
28 assays (Richards et al. 2004; Rosoff et al. 2004), and co-culture migration as-

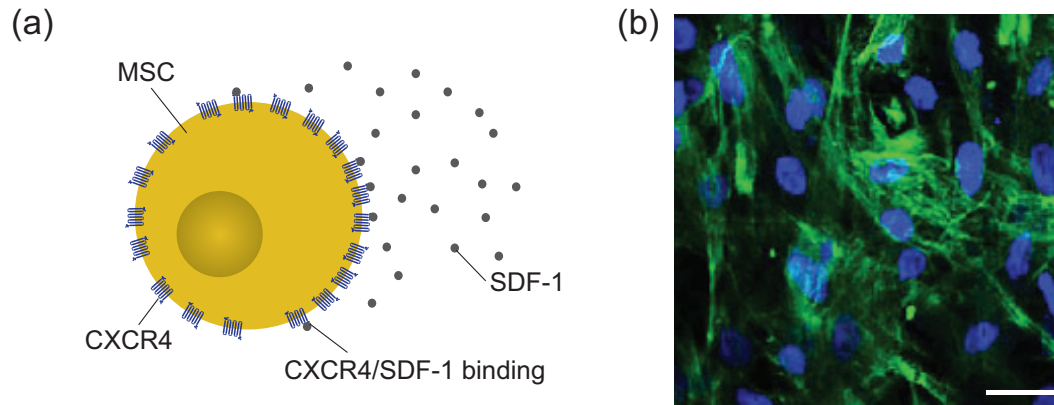

Fig. 1. Binding of signalling molecules to biological cells. (a) A schematic showing CXCR4–SDF-1 binding on an MSC. (b) An immunofluorescence image of MSCs demonstrating the expression of CXCR4 which SDF-1 molecules bind to. The blue fluorescence indicates MSC nuclei. The green fluorescence indicates the expression of CXCR4. The scale bar corresponds to 50  $\mu\text{m}$ .

29 says (Chung et al. 2009; Frimberger et al. 2006) are used to study the role  
30 of chemokinesis and chemotaxis. However, these experimental approaches suf-  
31 fer from many important limitations. Two key limitations are: (i) signalling  
32 molecules are technically difficult to visualise in real time (Tokoyoda et al.  
33 2004), and (ii) the spatial gradient of the signalling molecules is difficult to  
34 quantify (Chung et al. 2009).

35 Mathematical models have been widely used to mimic experimental observa-  
36 tions relating to chemokinesis and chemotaxis (Brumley et al. 2019; Simp-  
37 son et al. 2006). In the mathematical modelling literature, perhaps the most  
38 well-known model describing chemotaxis is the Keller–Segel partial differen-  
39 tial equation (PDE) model proposed in 1971 (Keller and Segel, 1971). This  
40 fundamental continuum model has since been generalised to describe both  
41 chemokinesis and chemotaxis simultaneously (Balding and McElwain 1985;  
42 Byrne et al. 1998; Hillen and Painter 2009; Sherratt 1994). Further extensions  
43 of these continuum models include: (i) incorporating multiple cell populations  
44 (Stinner et al. 2014); (ii) explicitly modelling receptor–molecule binding (Sher-  
45 ratt et al. 1993); (iii) treating aggregates of cells as multiple interacting phases  
46 (Byrne and Owen 2004); and (iv) modelling responses with multiple signalling

47 molecules (Painter et al. 2000). Apart from applying continuum PDEs to study  
48 cell migration stimulated by signalling molecules, discrete stochastic models  
49 have also been employed (Khain and Sander 2014; Pillay et al. 2018). Com-  
50 pared to continuum models, discrete models can be used to describe individual  
51 cell-level behaviour, and to specify how individual cells respond to signalling  
52 molecules. Using discrete models can be advantageous when comparing model  
53 predictions with experimental images that focus on individual cell level be-  
54 haviour.

55 A key limitation of standard modelling frameworks is that typical models of  
56 chemokinesis and chemotaxis explicitly describe spatial and temporal distri-  
57 butions of the signalling molecules, often using a reaction-diffusion equation  
58 (Painter et al. 2000; Stinner et al. 2014). This is an important limitation be-  
59 cause information about the spatial and temporal distributions of signalling  
60 molecules is rarely available from experiments (Chung et al. 2009; Tokoyoda et  
61 al. 2004). For example, we show an immunofluorescence image in Figure 1(b),  
62 with the green fluorescence indicating the expression of CXCR4. However, it  
63 is impossible to quantify the number of receptors or the spatial variability of  
64 the density of signalling molecules in this kind of standard experimental im-  
65 age. Therefore, it is unclear whether it is useful to mimic such an experiment  
66 with a mathematical model that explicitly describes the spatial and temporal  
67 variations in signalling molecule density. If one was to use a classical mod-  
68 elling approach, such as the Keller-Segel model, we would have no way of  
69 testing whether the spatial and temporal distributions of signalling molecules  
70 is accurate since these details are not available from standard experiments.

71 Motivated by new co-culture migration assays that we report in Section 2, the  
72 aim of this work is to develop an agent-based modelling framework that can  
73 be used to describe the dynamics of two interacting subpopulations of cells  
74 in a co-culture assay. In this model the movement of one type of agents is  
75 stimulated by the presence of signalling molecules that are produced by the

76 other type of agents. The spatial and temporal distribution of the signalling  
77 molecules is governed by discrete conservation statement that is related to  
78 a reaction–diffusion PDE. We refer to this new model as the *full discrete*  
79 *model* since we explicitly describe the spatial and temporal distributions of  
80 agents and signalling molecules. To make the full discrete model more com-  
81 patible with experimental data, we simplify the model by assuming that the  
82 dynamics of the signalling molecules is much faster than the time scale of cell  
83 migration. This simplification enables us to explore how the spatial distribu-  
84 tion of signalling molecules affects cell movement without having to solve the  
85 underlying conservation equation for the signalling molecules. We refer to this  
86 simplified model as the *reduced discrete model*. The reduced model is both  
87 simpler to apply than the full discrete model since there are less parameters  
88 to estimate, as well as being more consistent with experimental observations  
89 in which the details of the signalling molecules are not reported. To provide  
90 additional mathematical insight into these two different stochastic models we  
91 also explore the continuum limit descriptions of both the full and reduced dis-  
92 crete models are derived through mean field analysis. This leads to new PDE  
93 models of signalling molecule–stimulated cell migration.

## 94 **2 Co-culture experimental motivation**

95 To motivate our modelling work we perform and report typical data from a  
96 series of *in vitro* co–culture ring barrier migration assays (Das et al. 2015).  
97 The full experimental protocol is documented in the Supplementary Material.  
98 Briefly, this type of co-culture assay involves uniformly seeding one type of  
99 cells inside a circular ring barrier and uniformly seeding another type of cells  
100 uniformly outside of the ring barrier (Das et al. 2015). Interactions between  
101 the two cell types can give rise to either a chemokinetic or chemotactic effect,  
102 depending upon the particular cell lines used in the experiment. In our exper-

103 iments, hepatocytes are seeded inside the ring barrier and MSCs are seeded  
104 outside the ring barrier in each experimental well in a 12-well tissue culture  
105 plate (Figure 2(a)–(b)). After seeding, the tissue culture plate is placed in an  
106 incubator overnight to allow cells to attach to the substrate. After attachment,  
107 the ring barrier is removed, leaving a vacant annulus of width approximately  
108 1 mm (Figure 2(c)). Observations of the resulting cell migration are recorded  
109 by taking images of a small *field-of-view* over a 24 h period and recording the  
110 coordinates of particular cell trajectories over this period. Results in Figure  
111 2(f)–(g) compare the endpoints of 20 typical MSC trajectories in two different  
112 experiments. The trajectories in Figure 2(f) are taken from a control experi-  
113 ment in which hepatocytes are omitted and we see that the MSCs appear to  
114 migrate randomly, with no obvious preferred direction. In contrast, the trajec-  
115 tories in Figure 2(g) are taken from an experiment that includes hepatocytes  
116 and we see clear evidence that the MSC migration is directed towards the loca-  
117 tion of the hepatocytes. Typical experimental results, such as those in Figure  
118 2, do not provide any information about the temporal or spatial distribution  
119 of signalling molecules.

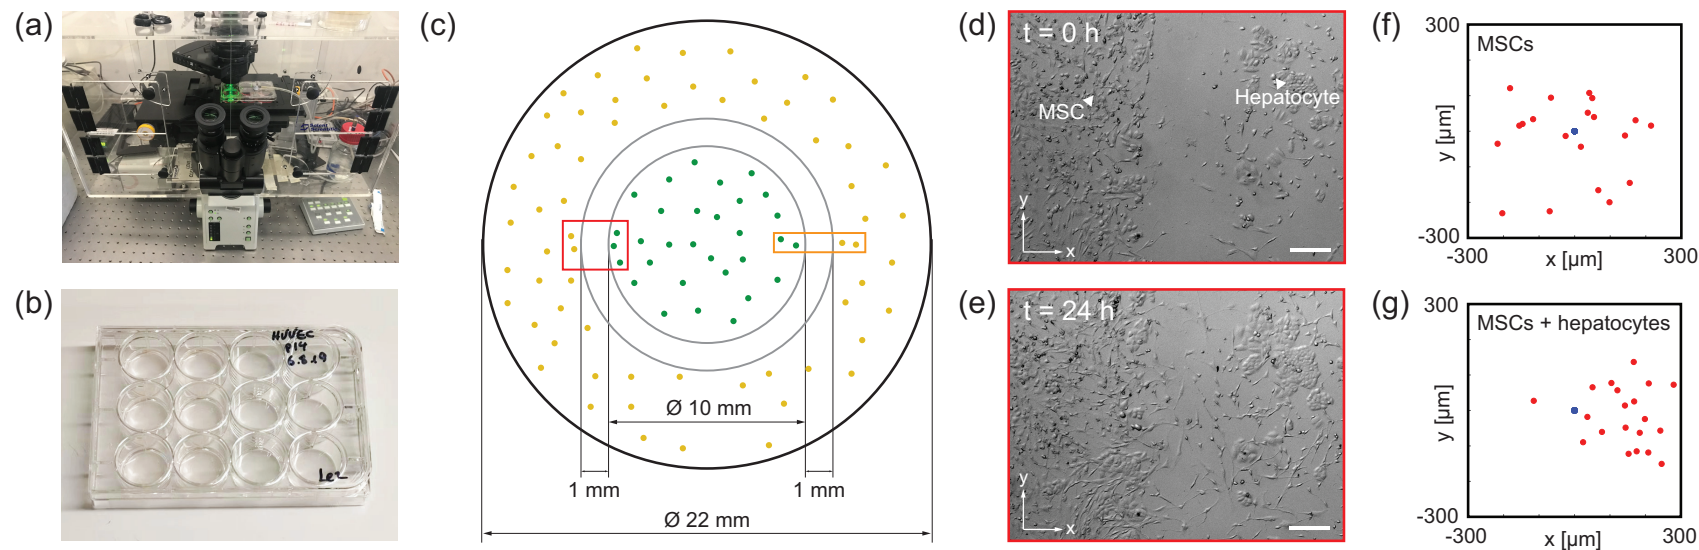

Fig. 2. Ring barrier co-culture assays. (a) Live cell imaging microscope showing the incubator and confocal microscope apparatus. (b) An image of a 12-well plate. Each well has a diameter of 22 mm. (c) Schematic of a ring barrier migration assay. Initially hepatocytes (green dots) are placed uniformly inside the ring barrier and MSCs (yellow dots) are placed uniformly outside the ring barrier, leaving a vacant annulus highlighted in grey. The red rectangle indicates the field of view. The orange rectangle indicates the simulation domain. (d)–(e) Experimental image at  $t = 0$  and 24h, respectively. The white scale bar corresponds to  $200 \mu\text{m}$ . (f) MSC trajectories in a control assay. (g) MSC trajectories in a co-culture assay including hepatocytes beyond the right boundary of the image. In both (f) and (g), the blue circles indicate cell positions at  $t = 0$  h, and the red circles indicate cell positions at  $t = 24$  h. All trajectories are shifted so that they start at the origin.



120 Many experimental studies indicate a role for chemokinesis or chemotaxis in  
121 co-culture experiments but do not show any spatial or temporal information  
122 about distributions of signalling molecules (Das et al. 2015). Therefore, we  
123 are motivated to model such experiments in a different way. For simplicity  
124 we apply our models to a small rectangular subregion as illustrated by the  
125 orange rectangle in Figure 2(c). Migration of cells in this subregion is pre-  
126 dominantly horizontal, and to be consistent with this we develop our models  
127 in a one-dimensional geometry. Typical doubling times of MSC cell are over  
128 50 h (Gruber et al. 2012), and since we only focus on relatively short time  
129 experiments we neglect the contribution of cell proliferation in our models.

### 130 **3 Discrete models**

131 The experimental data in Figure 2 provides strong evidence that MSC migra-  
132 tion is biased in the presence of hepatocytes. Since hepatocytes are known to  
133 produce signalling molecules, such as SDF-1, we hypothesize that the directed  
134 migration of MCSs in Figure 2 is driven by a chemical signal. However, the  
135 data in Figure 2 does not indicate whether the directed migration arises from  
136 chemokinesis or chemotaxis, since both of these mechanisms can give rise to  
137 directed migration in the presence of a gradient of signalling molecule (Cai  
138 et al. 2006; Painter and Sherratt 2003). The modelling framework developed  
139 in this study can be used to examine either chemokinesis, chemotaxis, or a  
140 combination of chemokinesis and chemotaxis. For simplicity, we present the  
141 details by focusing on modelling chemokinesis in the main document. Addi-  
142 tional results for modelling chemotaxis are presented in the Supplementary  
143 Material.

144 3.1 Full discrete model

145 We consider an agent-based model on a one-dimensional lattice where each  
146 site is indexed  $i \in [1, I]$  and has position  $x = (i - 1)\Delta$ , where  $\Delta$  is the  
147 lattice spacing that we take to be a typical cell diameter. The lattice is occu-  
148 pied by two different types of agents that represent the two different types of  
149 cells in the co-culture experiment: *Subpopulation 1* which secretes signalling  
150 molecules, such as the hepatocytes in Figure 2, and *Subpopulation 2* which  
151 senses and responds to the signalling molecules, such as the MSCs in Figure  
152 2. The model is an exclusion process, meaning that each lattice site can be  
153 occupied by, at most, one agent. Therefore, in any single realisation of the  
154 model the occupancy of agents from Subpopulation 1 is given by  $A_i \in \{0, 1\}$ .  
155 If site  $i$  is occupied by an agent from Subpopulation 1 we have  $A_i = 1$ ,  
156 and  $A_i = 0$  otherwise. Similarly, in any single realisation of the model the  
157 occupancy of agents from Subpopulation 2 is given by  $B_i \in \{0, 1\}$ . The total  
158 number of agents from Subpopulation 1 and Subpopulation 2 are  $N_1$  and  $N_2$ ,  
159 respectively.

160 Since signalling molecules are many orders of magnitude smaller than cells,  
161 we allow each lattice site to be occupied by an arbitrary number of molecules,  
162 and we describe the density of signalling molecules at site  $i$  as  $C_i \in [0, \infty)$ ,  
163 where  $C_i$  is a continuous function of time. We assume that  $C_i$  is measured  
164 in some appropriate unit, such as  $\mu\text{M}$ . Such hybrid models that treat cells as  
165 discrete objects and signalling molecules as continuous densities is standard in  
166 the mathematical biology literature (Alacón et al. 2003; Mallet and de Pillis  
167 2006). We will now specify how agents on the lattice move in response to the  
168 signalling molecules.

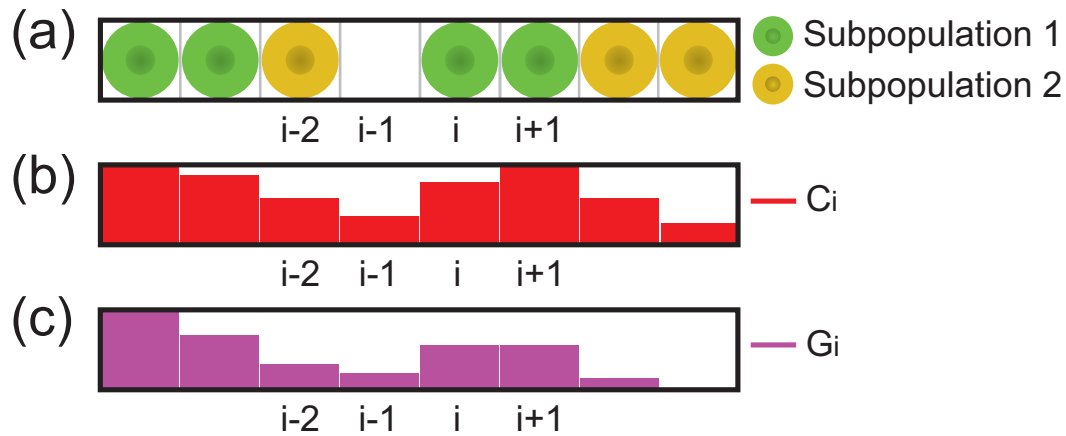

Fig. 3. Discrete modelling framework. (a) A schematic of the agent-based model comprising Subpopulation 1 and Subpopulation 2. (b) Spatial distribution of the signalling molecule density in the full discrete model. (c) Spatial distribution of the approximate density of the signalling molecule density in the reduced discrete model.

### 169 3.1.1 Agent movement

170 Within a particular time step of duration  $\tau$ , agents from Subpopulation 1 and  
 171 Subpopulation 2 attempt to undergo a nearest neighbour random walk with  
 172 probability  $f_1(C_i) \in [0, 1]$  and  $f_2(C_i) \in [0, 1]$ , respectively. The functional  
 173 forms of  $f_1(C_i)$  and  $f_2(C_i)$  determine how the agents respond to the density  
 174 of signalling molecules. For example, if  $f_1(C_i)$  is increasing, the signalling  
 175 molecules amplify the migration rate of Subpopulation 1. We will discuss the  
 176 particular choice of  $f_1(C_i)$  and  $f_2(C_i)$  in Section 5.2.

177 Agent movement is simulated using a random sequential update method. Dur-  
 178 ing a time step of duration  $\tau$ ,  $N_1 + N_2$  agents are randomly selected, one at a  
 179 time, with replacement (Jin et al. 2016a). If an agent from Subpopulation 1 at  
 180 site  $i$  is selected, that agent attempts to undergo a nearest neighbour random  
 181 walk with probability  $f_1(C_i)$ . Similarly, if an agent from Subpopulation 2 at  
 182 site  $i$  is selected, that agent attempts to undergo a nearest neighbour random  
 183 walk with probability  $f_2(C_i)$ . In all cases the target site is chosen at ran-  
 184 dom, and potential motility events are aborted if the target site is occupied.  
 185 Reflecting boundary conditions are applied.

186 *3.1.2 Signalling molecules*

187 To be consistent with our experimental observations in Figure 1, we assume  
 188 the signalling molecules are secreted by agents from Subpopulation 1 at a  
 189 particular rate. The signalling molecules diffuse, undergo decay, and are taken  
 190 up by agents from Subpopulation 2. We suppose that the spatial and tem-  
 191 poral distribution of signalling molecules is governed by discrete conservation  
 192 statement,

$$\frac{\delta C_i}{\tau} = \overbrace{\frac{D_c}{\Delta^2} [C_{i-1} - 2C_i + C_{i+1}]}^{\text{linear diffusion}} + \overbrace{\lambda A_i}^{\text{secretion by Subpopulation 1}} - \overbrace{\kappa C_i B_i}^{\text{uptake by Subpopulation 2}} - \overbrace{\mu C_i}^{\text{intrinsic decay}}, \quad (1)$$

193 where  $D_c$  [ $\mu\text{m}^2/\text{h}$ ] is the molecular diffusivity,  $\lambda$  [ $\mu\text{M}/\text{h}$ ] is the secretion rate,  $\kappa$   
 194 [ $1/\text{h}$ ] is the uptake rate and  $\mu$  [ $1/\text{h}$ ] is the intrinsic decay rate. We solve Equation  
 195 (1) numerically as outlined in the Supplementary Material.

196 *3.2 Reduced discrete model*

197 We now formulate a reduced discrete model that retains key elements of the  
 198 full discrete model without the need to explicitly solve for the spatial and  
 199 temporal distribution of the signalling molecules. To distinguish between the  
 200 two models we write the site occupancy of Subpopulation 1 and Subpopulation  
 201 2 as  $U_i \in \{0, 1\}$  and  $V_i \in \{0, 1\}$ , respectively. The diffusivity of signalling  
 202 molecules is approximately three orders of magnitude greater than a typical  
 203 cell diffusivity (Jin et al. 2017; Mac Gabhann and Popel 2004). This motivates  
 204 us to simplify the model by assuming we have quasi-steady conditions since  
 205 the diffusive transport evolves on much faster timescale than the source terms  
 206 on the right of Equation (1). If the magnitude of the source terms in Equation  
 207 (1) are negligible relative to the diffusive transport term, at steady state we  
 208 have  $C_{i+1} - 2C_i + C_{i-1} = \delta C_i = 0$ . Setting  $C_{i+1} - 2C_i + C_{i-1} = 0$  and

209  $\delta C_i = 0$  in Equation (1) gives  $C_i = \lambda U_i / (\mu + \kappa V_i)$ , which could be a useful  
210 way to indirectly represent the effect of the signalling molecules as a function  
211 of the spatial arrangement of the agents on the lattice. This kind of quasi-  
212 steady assumption is often used to simplify continuum mathematical models  
213 where some kind of diffusible signal (e.g. Cai et al. 2006) or diffusible nutrient  
214 (e.g. Breward et al. 2002) is assumed to approach steady state much faster  
215 than the dynamics of some population of cells. The consequences of making  
216 such assumptions in a stochastic framework are rarely, if ever, examined in  
217 detail.

218 Since we have an exclusion process, each lattice site can be occupied by a  
219 single agent. Therefore, simply applying  $C_i = \lambda U_i / (\mu + \kappa V_i)$  leads to  $C_i = 0$   
220 at any site with  $U_i = 0$ , or  $C_i = \lambda / \mu$  for any site with  $U_i = 1$ . To make  
221 this approximation more realistic, we take the occupancy of lattice site  $i$  to  
222 be the average of the nearest neighbour lattice sites,  $\hat{U}_i = (U_{i-1} + U_{i+1}) / 2$   
223 and  $\hat{V}_i = (V_{i-1} + V_{i+1}) / 2$ , giving

$$G_i = \frac{\lambda \hat{U}_i}{\mu + \kappa \hat{V}_i}. \quad (2)$$

224 Therefore, in the reduced model, we take  $G_i$  to approximate density of the  
225 signalling molecule density at site  $i$ . Using this approximation in our discrete  
226 modelling framework allows us to implicitly simulate the role of the signalling  
227 molecules without needing to solve Equation (1). This approach has three  
228 clear advantages over the full discrete model: (i) the reduced discrete model  
229 involves less parameters than the full discrete model; (ii) the reduced discrete  
230 model is faster to computer than the full discrete model since there is no need  
231 to solve the evolution equation for  $C_i$ ; and (iii) the reduced discrete model is  
232 more consistent with typical experimental observations that do not measure  
233 or report spatial and temporal distributions of the signalling molecules.

234 The reduced discrete model is implemented computationally using a similar

235 random sequential update method. The only difference is that in the reduced  
236 discrete model we apply  $f_1(G_i)$  and  $f_2(G_i)$  instead of  $f_1(C_i)$  and  $f_2(C_i)$ , and  
237 there is no need to solve the evolution equation for  $C_i$ . Of course, the key  
238 question that we are interested in now is to establish when the reduced model  
239 provides a good approximation to the full model. Intuitively we expect that  
240 the reduced discrete model will be a good approximation of the full model  
241 when  $C_i$  is accurately approximated by  $G_i$ . However, to explore this quanti-  
242 tatively we need to compare the performance of the two models over a series  
243 of biologically relevant parameter values. Before we consider this comparison,  
244 we also provide more mathematical insight into the two models by deriving  
245 approximate continuum limit descriptions of the two discrete modelling frame-  
246 works.

## 247 4 Continuum limit descriptions

248 We begin the continuum limit derivation by assuming we have access to a large  
249 number of identically prepared realisations of the full discrete model, and we  
250 denote the average occupancy of Subpopulation 1 and Subpopulation 2 at site  
251  $i$  by  $\bar{A}_i \in [0, 1]$  and  $\bar{B}_i \in [0, 1]$ , respectively. Similarly, the average density of  
252 signalling molecules at site  $i$  is given by  $\bar{C}_i \in [0, \infty)$ . Invoking a mean-field  
253 assumption and accounting for all possible events that alter the occupancy of

254 site  $i$  over a time step of duration  $\tau$ , we obtain

$$\delta \bar{A}_i = \overbrace{\frac{1}{2} (1 - \bar{S}_i) (f_1(\bar{C}_{i-1}) \bar{A}_{i-1} + f_1(\bar{C}_{i+1}) \bar{A}_{i+1})}^{\text{migration into site } i} - \underbrace{\frac{f_1(\bar{C}_i)}{2} \bar{A}_i (2 - \bar{S}_{i-1} - \bar{S}_{i+1})}_{\text{migration out of site } i}, \quad (3)$$

$$\delta \bar{B}_i = \overbrace{\frac{1}{2} (1 - \bar{S}_i) (f_2(\bar{C}_{i-1}) \bar{B}_{i-1} + f_2(\bar{C}_{i+1}) \bar{B}_{i+1})}^{\text{migration into site } i} - \underbrace{\frac{f_2(\bar{C}_i)}{2} \bar{B}_i (2 - \bar{S}_{i-1} - \bar{S}_{i+1})}_{\text{migration out of site } i}, \quad (4)$$

255 where  $\delta \bar{A}_i$  and  $\delta \bar{B}_i$  are the change in occupancy at site  $i$  of Subpopulation 1  
 256 and 2, respectively, and  $\bar{S}_i = \bar{A}_i + \bar{B}_i$  is the total average occupancy at site  
 257  $i$ . To convert these discrete conservation statements into continuous expres-  
 258 sions we identify the discrete variables with appropriate continuous variables,  
 259  $\bar{A}_i(t) = a(x, t)$ ,  $\bar{B}_i(t) = b(x, t)$  and  $\bar{C}_i(t) = c(x, t)$ . Expanding each term  
 260 in Equations (3)–(4) about site  $i$  using a Taylor series and neglecting terms  
 261 of  $\mathcal{O}(\Delta^3)$ , we divide both sides of the resulting expressions by  $\tau$  and take the  
 262 limit  $\Delta \rightarrow 0$  and  $\tau \rightarrow 0$  jointly, with the ratio  $\Delta^2/\tau$  held constant, to give

$$\frac{\partial a}{\partial t} = \frac{\partial}{\partial x} \left[ (1 - s) \frac{\partial}{\partial x} (D_a(c)a) + D_a(c)a \frac{\partial s}{\partial x} \right], \quad (5)$$

$$\frac{\partial b}{\partial t} = \frac{\partial}{\partial x} \left[ (1 - s) \frac{\partial}{\partial x} (D_b(c)b) + D_b(c)b \frac{\partial s}{\partial x} \right], \quad (6)$$

$$\frac{\partial c}{\partial t} = D_c \frac{\partial^2 c}{\partial x^2} + \lambda a - \kappa cb - \mu c, \quad (7)$$

263 where  $D_a = \Delta^2 f_1(c)/(2\tau)$  and  $D_b = \Delta^2 f_2(c)/(2\tau)$  are the diffusion coeffi-  
 264 cients for Subpopulation 1 and Subpopulation 2, respectively and  $s(x, t) = a(x, t) +$   
 265  $b(x, t)$ . We refer to Equations (5)–(7) as the *full continuum model*.

266 The continuum limit description of the reduced discrete model can be obtained

267 using a very similar approach. The approximate conservation statements for  
 268 the two subpopulations can be written as,

$$\delta\bar{U}_i = \frac{1}{2} (1 - \bar{S}_i) \left( f_1(\bar{G}_{i-1})\bar{U}_{i-1} + f_1(\bar{G}_{i+1})\bar{U}_{i+1} \right) - \frac{f_1(\bar{G}_i)}{2} \bar{U}_i (2 - \bar{S}_{i-1} - \bar{S}_{i+1}), \quad (8)$$

$$\delta\bar{V}_i = \frac{1}{2} (1 - \bar{S}_i) \left( f_2(\bar{G}_{i-1})\bar{V}_{i-1} + f_2(\bar{G}_{i+1})\bar{V}_{i+1} \right) - \frac{f_2(\bar{G}_i)}{2} \bar{V}_i (2 - \bar{S}_{i-1} - \bar{S}_{i+1}), \quad (9)$$

269 where all terms have a similar interpretation to those in Equations (3)–(4).

270 We proceed to the continuum limit in the same way, arriving at

$$\frac{\partial u}{\partial t} = \frac{\partial}{\partial x} \left[ (1 - s) \frac{\partial}{\partial x} (D_u(g)u) + D_u(g)u \frac{\partial s}{\partial x} \right], \quad (10)$$

$$\frac{\partial v}{\partial t} = \frac{\partial}{\partial x} \left[ (1 - s) \frac{\partial}{\partial x} (D_v(g)v) + D_v(g)v \frac{\partial s}{\partial x} \right]. \quad (11)$$

271 where  $u(x, t)$  and  $v(x, t)$  are the densities of Subpopulation 1 and Subpopu-  
 272 lation 2, respectively. Here,  $D_a = \Delta^2 f_1(g)/(2\tau)$  and  $D_b = \Delta^2 f_2(g)/(2\tau)$   
 273 are the diffusion coefficients for Subpopulation 1 and Subpopulation 2, respec-  
 274 tively. We refer to Equations (10)–(11) as the *reduced continuum model*.

## 275 5 Results and Discussion

276 In this section we explore solutions of the full and reduced models, both dis-  
 277 crete and continuum, for a typical geometry and timescale that reflect the  
 278 co-culture assay in Figure 2. For the discrete models we set  $\tau = 0.01$  h and  
 279  $\Delta = 20 \mu\text{m}$  to reflect a typical cell diameter. To simulate the width of the  
 280 experimental field-of-view in Figure 2(c) we choose  $I = 201$ . We initialise the  
 281 discrete simulations by placing agents from Subpopulation 1 to the left of the  
 282 domain and agents from Subpopulation 2 to the right of the domain at  $t = 0$ .



283 All sites with  $i \leq 76$  are randomly populated with probability 0.6 by agents  
284 from Subpopulation 1 and all sites with  $i \geq 126$  are randomly populated with  
285 probability 0.6 by agents from Subpopulation 2. This initial condition leaves  
286  $1000 \mu\text{m}$  of vacant space in the middle of the domain which is consistent with  
287 the initial width of the annulus of free space in Figure 2. In the full discrete  
288 model we assume that  $C_i = 0$  at all sites at  $t = 0$ .

289 The full and reduced continuum models are solved numerically as outlined in  
290 the Supplementary Material. The initial condition in the continuum model is  
291 consistent with the discrete models by setting  $a(x, 0) = 0.6$  for  $0 \leq x \leq$   
292  $1500 \mu\text{m}$ ,  $b(x, 0) = 0.6$  for  $2500 \leq x \leq 4000 \mu\text{m}$ , and  $a(x, 0) = b(x, 0) = 0$   
293 elsewhere. In the full continuum model we set  $c(x, 0) = 0$  for  $0 \leq x \leq 4000 \mu\text{m}$   
294 and we will comment on this choice of initial conditions later.

### 295 5.1 Choice of model parameters

296 To make our simulations consistent with experimental observations we note  
297 that MSCs are known to respond to diffusible molecules secreted by hepato-  
298 cytes in co-culture assays, whereas the migration of hepatocytes are unaffected  
299 by the presence of MSCs in co-culture (Novo et al. 2011; Yoon et al. 2016).  
300 Accordingly, in the discrete models we assume that agents from both subpop-  
301 ulations undergo unbiased migration when  $C_i = 0$  and that  $C_i$  has no impact  
302 upon the migration of Subpopulation 1 so we set  $f_1(C_i)$  to be a constant. In  
303 contrast, we choose  $f_2(C_i)$  to be a smooth increasing function, given by

$$f_2(C_i) = \frac{1}{(1 + He^{-\alpha C_i})}, \quad (12)$$

304 where  $\alpha \geq 0$  specifies the strength of the chemokinetic response, and  $H$  is a  
305 constant relating to the migration rate of Subpopulation 2 in the absence of sig-  
306 nalling molecules. In this section we choose  $H = 9$ , which gives  $f_2(0) = 1/10$ .

307 We set  $f_1(C_i) = f_2(0) = 1/10$  so that in the absence of the chemical signal,  
308 agents from both subpopulations undergo unbiased random migration at the  
309 same rate. In terms of the continuum limit description, our choices of  $\Delta$ ,  $\tau$ ,  
310  $f_1(C_i)$  and  $f_2(C_i)$  correspond to  $D_a = D_b(0) = D_u = D_v(0) = 2000$   
311  $\mu\text{m}^2/\text{h}$  which is a typical value of cell diffusivity in low density tissue culture  
312 (Jin et al. 2016b).

313 There are five free parameters in the full and reduced models:  $D_c$ ,  $\lambda$ ,  $\kappa$ ,  $\mu$ , and  
314  $\alpha$ . We note that the diffusivity of typical diffusible molecules is approximately  
315  $10^5 \mu\text{m}^2/\text{h}$  (Mac Gabhann and Popel 2004; Veldkamp et al. 2009). Exper-  
316 imental observations of the half life of diffusible molecules is around 0.5 h  
317 (Kirkpatrick et al. 2010), which corresponds to an exponential decay rate of  
318 approximately 1 /h. Therefore, we set  $D_c = 10^5 \mu\text{m}^2/\text{h}$  and  $\mu = 1 /\text{h}$ . We  
319 are unaware of any detailed experimental measurements of production and  
320 uptake rates of SDF-1 for co-culture experiments with hepatocytes and MSC  
321 so we choose  $\lambda = 1 \mu\text{M}/\text{h}$  and  $\kappa = 1 /\text{h}$ , to be of the same order as the decay  
322 rate. Later we will vary these choices of parameter values to gain insight into  
323 the sensitivity of the model predictions to these choices of parameter values.

## 324 5.2 Comparisons of the full and reduced models

325 Results in Figure 4(a)–(b) show snapshots of the time evolution of agent posi-  
326 tions in the full and reduced discrete models, respectively. In these preliminary  
327 simulations we specify a weak chemokinetic effect,  $\alpha = 1$ . Comparing the  
328 distribution of agents in different rows of the subfigures shows that the two  
329 subpopulations migrate into the initially-vacant space over time. We estimate  
330 the expected behaviour of the simulations by averaging the occupancy of each  
331 lattice site using 500 identically-prepared realisations of the stochastic models  
332 and show the averaged density profiles in Figure 4(c) where we see that the  
333 averaged density profiles from the reduced discrete model compares very well.

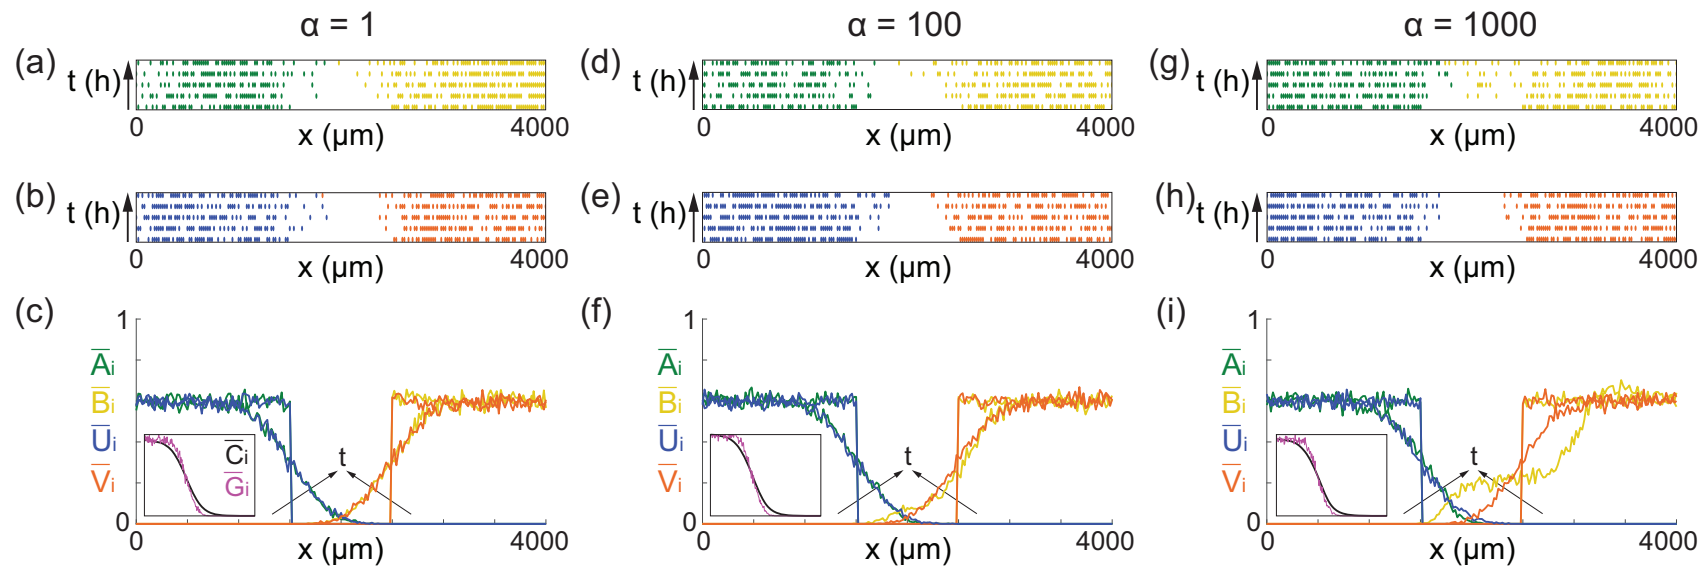

Fig. 4. Comparison of the full and reduced discrete models. (a), (d), (g) Snapshots from the full discrete model at  $t = 0, 6, 12, 18,$  and  $24$  h. The arrow along the vertical direction indicates increasing time. (b), (e), (h) Snapshots from the reduced discrete model at  $t = 0, 6, 12, 18,$  and  $24$  h. (c), (f), (i) Density profiles of Subpopulation 1 and Subpopulation 2 from the full and reduced discrete models at  $t = 0$  and  $24$  h. The black arrow indicates increasing time. The inset in each subfigure shows profiles of the  $\bar{C}_i$  and  $\bar{G}_i$  at  $t = 24$  h. All the simulation data are obtained by averaging over 500 statistically identically prepared realisations.  $D_a = D_b(0) = D_u = D_v(0) = 2000 \mu\text{m}^2/\text{h}$ ,  $D_c = 10^5 \mu\text{m}^2/\text{h}$ ,  $\lambda = 1 \mu\text{M}/\text{h}$ , and  $\kappa = \mu = 1/\text{h}$ ,  $\Delta = 20 \mu\text{m}$  and  $\tau = 0.01$  h for all the simulations.

334 To investigate how the comparison between the full and reduced discrete mod-  
335 els depends upon the strength of the chemokinetic effect we present additional  
336 results in the in Figure 4 (d)–(e) for  $\alpha = 100$  and in Figure 4 (g)–(h) for  
337  $\alpha = 1000$ . Comparing the averaged density profiles at  $t = 24$  h shows that  
338 we maintain reasonably good agreement between the reduced and full models  
339 for the moderate chemokinetic effect in Figure 4(f) but we see that the re-  
340 duced discrete model does not approximate the full discrete model very well  
341 when the chemokinetic effect is strong, as in Figure 4(i). In addition, in the  
342 Supplementary Material we compare the averaged density profiles at  $t = 48$   
343 h to allow more time, beyond the typical experimental timescale, for the two  
344 subpopulations to interact. These additional results over a longer time scale  
345 are consistent with the results in Figure 4.

346 All results in Figure 4 correspond to discrete results. We now examine how  
347 well the averaged data from the two discrete models compare with the numer-  
348 ical solution of the associated continuum limit descriptions. Results in Figure  
349 5(a)–(c) compare averaged density profiles from the full model with corre-  
350 sponding solutions of Equations (5)–(7) for  $\alpha = 1, 100$  and  $1000$ , respectively.  
351 These results show that the new PDE models provide an accurate approxi-  
352 mation of the averaged behaviour of the full discrete model when  $\alpha = 1$   
353 and  $\alpha = 100$ , but that the solution of the continuum limit PDE does not  
354 provide an accurate approximation of the averaged data from the full discrete  
355 model when chemokinesis is sufficiently strong,  $\alpha = 1000$ . Similarly, results  
356 in Figure 5(d)–(f) compare averaged density profiles from the reduced model  
357 with corresponding solutions of Equations (10)–(11) for  $\alpha = 1, 100$  and  $1000$ ,  
358 respectively. Again, we see that the solution of the continuum limit PDE mod-  
359 els provides a good approximation of the averaged behaviour of the reduced  
360 discrete model when  $\alpha = 1$  and  $\alpha = 100$ , but we observe some discrepancy  
361 when the chemokinesis is sufficiently strong,  $\alpha = 1000$ . Therefore, while  
362 the continuum limit PDEs can provide a good description of the average be-

363 haviour of the discrete model for certain parameter choices, they do not always  
364 provide a good approximation of the discrete models and this discrepancy is  
365 associated with the failure of the mean-field approximation (Simpson et al.  
366 2010). Therefore, for the remainder of this study we will focus on using the  
367 discrete models and explore the differences in the performance of the full and  
368 reduced discrete models.

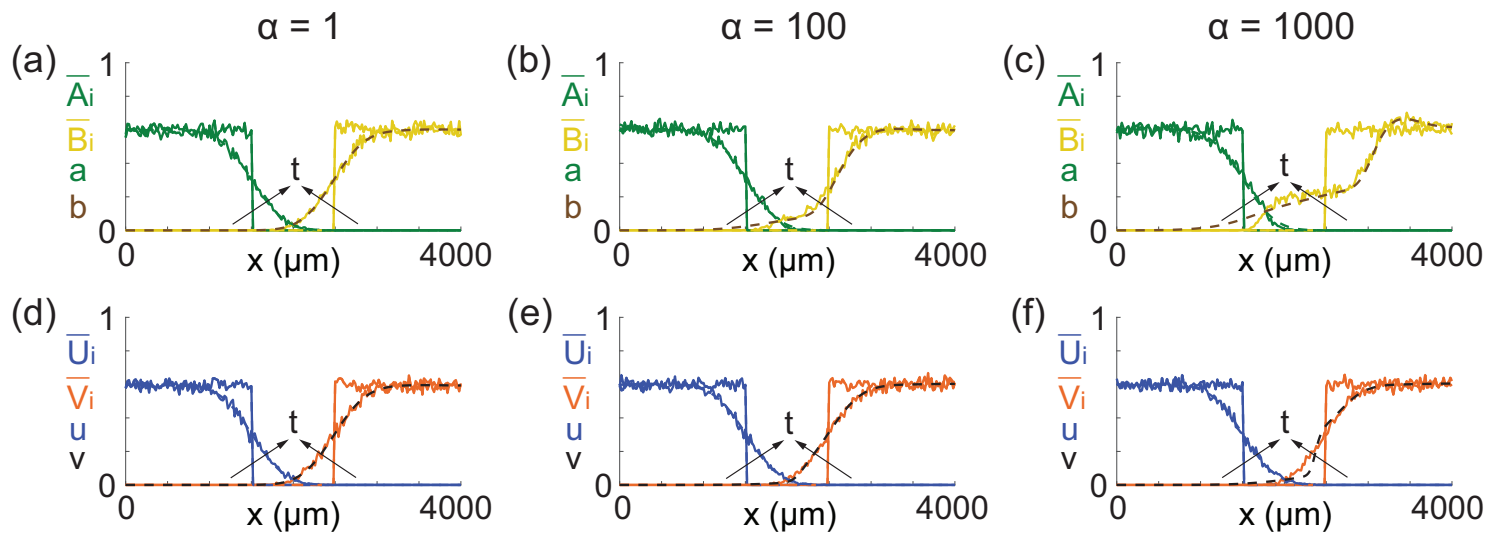

Fig. 5. Continuum–discrete comparisons of the full and reduced models. (a)–(c) Continuum–discrete comparisons of the full models at  $t = 0$  and 24 h. (d)–(f) Continuum–discrete comparisons of the reduced models at  $t = 0$  and 24 h. The solid line indicates results from the discrete models. The dashed line indicates results from the continuum models. The black arrow indicates increasing time.  $D_a = D_b(0) = D_u = D_v(0) = 2000 \mu\text{m}^2/\text{h}$ ,  $D_c = 10^5 \mu\text{m}^2/\text{h}$ ,  $\lambda = 1 \mu\text{M}/\text{h}$ , and  $\kappa = \mu = 1 / \text{h}$  for all the cases.  $\Delta = 20 \mu\text{m}$  and  $\tau = 0.01 \text{ h}$  for all the discrete simulations.

369 We now quantitatively explore the difference between the full and reduced  
370 discrete models for a range of signalling molecules diffusivity ( $D_c = 10, 10^5,$   
371  $10^6 \mu\text{m}^2/\text{h}$ ) and a range of chemokinetic strengths ( $\alpha = 1, 100, 1000$ ). To  
372 quantify the quality-of-match between the full and reduced models, we com-  
373 pute a measure of the least-squares difference between the averaged density  
374 profiles,

$$E_1(t; D_c, \alpha, \lambda, \kappa, \mu) = \frac{1}{M} \sum_{m=1}^M \sum_{i=1}^I \left( A_i^{(m)}(t) - U_i^{(m)}(t) \right)^2, \quad (13)$$

$$E_2(t; D_c, \alpha, \lambda, \kappa, \mu) = \frac{1}{M} \sum_{m=1}^M \sum_{i=1}^I \left( B_i^{(m)}(t) - V_i^{(m)}(t) \right)^2, \quad (14)$$

375 where  $m$  is an index indicating the number of identically-prepared realisa-  
376 tions and  $M = 500$  is the total number of identically-prepared realisations  
377 considered. For each combination of  $D_c$  and  $\alpha$  that we consider, we compute  
378  $E_1(24; D_c, \alpha, \lambda, \kappa, \mu)$  and  $E_2(24; D_c, \alpha, \lambda, \kappa, \mu)$  with fixed values of  $\lambda = 1$   
379  $\mu\text{M}/\text{h}$  and  $\kappa = \mu = 1/\text{h}$ , and we plot the averaged density profiles at  
380  $t = 24$  h in Figure 6. Results in Figure 6 indicate that  $E_1$  is relatively small  
381 and insensitive to the parameter values we consider. In contrast,  $E_2$  increases  
382 with both  $\alpha$  and  $D_c$ . In particular we see that the reduced discrete model  
383 can provide a very good approximation of the full discrete model when  $\alpha$  is  
384 sufficiently small, but the approximation becomes poor when  $\alpha$  increases.

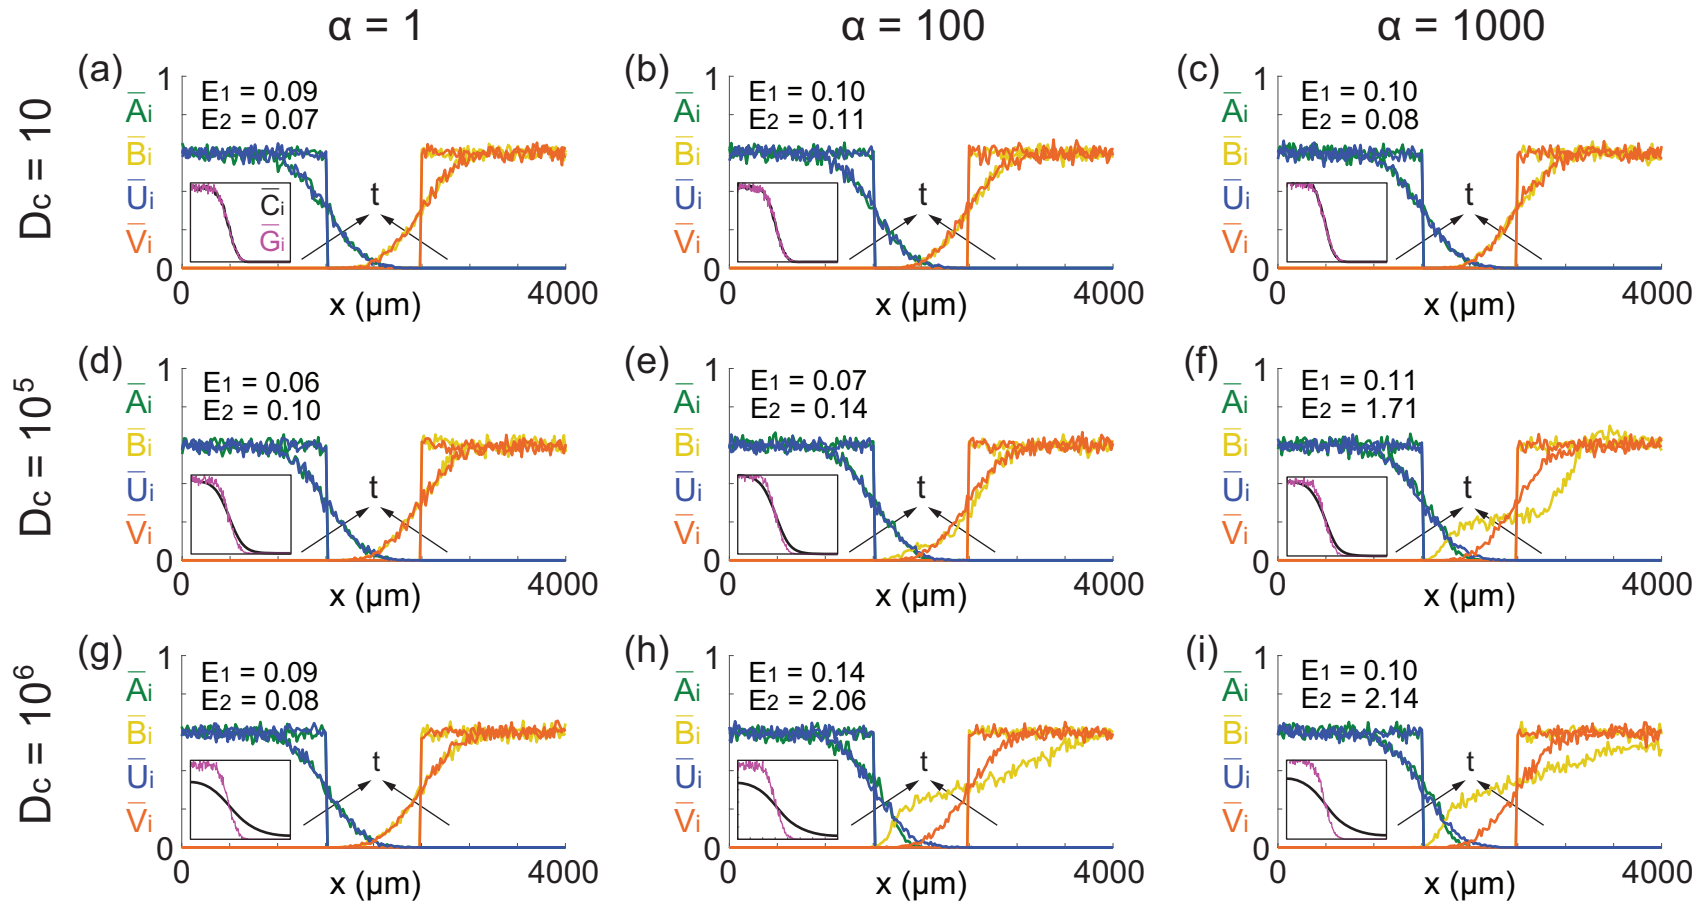

Fig. 6. Comparisons of the results from the full and reduced discrete models. Density profiles of Subpopulation 1 and Subpopulation 2 from the full and reduced discrete models at  $t = 0$  and 24 h are shown. The inset in each subfigure compares  $\bar{C}_i$  and  $\bar{G}_i$  at  $t = 24$  h. The black arrow indicates increasing time.  $D_a = D_b(0) = D_u = D_v(0) = 2000 \mu\text{m}^2/\text{h}$ ,  $\lambda = 1 \mu\text{M}/\text{h}$ ,  $\kappa = \mu = 1 / \text{h}$ ,  $\Delta = 20 \mu\text{m}$  and  $\tau = 0.01$  h for all the simulations.



385 In addition to comparing averaged agent density profiles for the full and dis-  
386 crete models, the insets provided in each subfigure of Figure 6 show the spatial  
387 distributions of  $\bar{C}_i$  and  $\bar{G}_i$  at  $t = 24$  h. We see that  $\bar{C}_i$  is accurately approx-  
388 imated by  $\bar{G}_i$  when  $D_c = 10$  and  $10^5 \mu\text{m}^2/\text{h}$ , whereas the comparison is  
389 poor when  $D_c = 10^6 \mu\text{m}^2/\text{h}$ . As a result we have relatively good agreement  
390 between the full and reduced averaged density profiles in Figure 6(a)–(e) since  
391  $\bar{C}_i$  is reasonably well approximated by  $\bar{G}_i$ . However, results in Figure 6(f)  
392 shows that even with a relatively good match between  $\bar{C}_i$  and  $\bar{G}_i$ , the match  
393 between the averaged density profiles of the full and reduced discrete models  
394 can still be poor when the strength of chemotaxis is sufficiently large, here  
395  $\alpha = 1000$ . Results in Figure 6(h)–(i) correspond to cases where  $\bar{C}_i$  and  $\bar{G}_i$  do  
396 not match well and in all these cases we see that the average density profiles  
397 in the reduced discrete model do not provide a good approximation of the  
398 averaged density profiles in the full discrete model.

399 Overall, comparing the average density profiles in Figure 6 confirms that the  
400 reduced discrete model can be used to approximate the full discrete model for  
401 certain parameter choices. In general we see that the quality of match between  
402 the two models tends to decrease with  $\alpha$  and the performance of the reduced  
403 model is also sensitive to other parameters such as  $D_c$ . To provide further  
404 insight into how the performance of the reduced discrete model depends upon  
405 the choice of parameters we compute  $E_1$  and  $E_2$  at  $t = 24$  h over a range of  
406  $\mu$ ,  $\lambda$ ,  $\alpha$  and  $D_c$ . For each choice of  $\alpha$  and  $D_c$ , we construct two-dimensional  
407 heat maps showing  $E_1$  and  $E_2$  as a function of  $\mu$  and  $\lambda$ . The heat maps,  
408 shown in Figure 7, indicate that the reduced model provides a reasonably good  
409 approximation of the full model provided we have a sufficiently small  $\alpha$  and  
410  $D_c$ . Comparing the magnitude of  $E_1$  and  $E_2$  as a function of  $\lambda$  and  $\mu$  indicates  
411 that the accuracy of the reduced discrete model is less sensitive to variation  
412 in  $\lambda$  and  $\mu$  than it is to variations in  $\alpha$  and  $D_c$ . Similar results (not shown)  
413 also indicate that  $E_1$  and  $E_2$  are relatively insensitive to the choice of  $\kappa$  for

414 the choice of initial condition to mimic the co-culture experiments in Figure  
415 2. Therefore, we have chosen to focus our examination of the performance of  
416 the reduced discrete model to  $\alpha$ ,  $D_c$ ,  $\lambda$  and  $\mu$ .

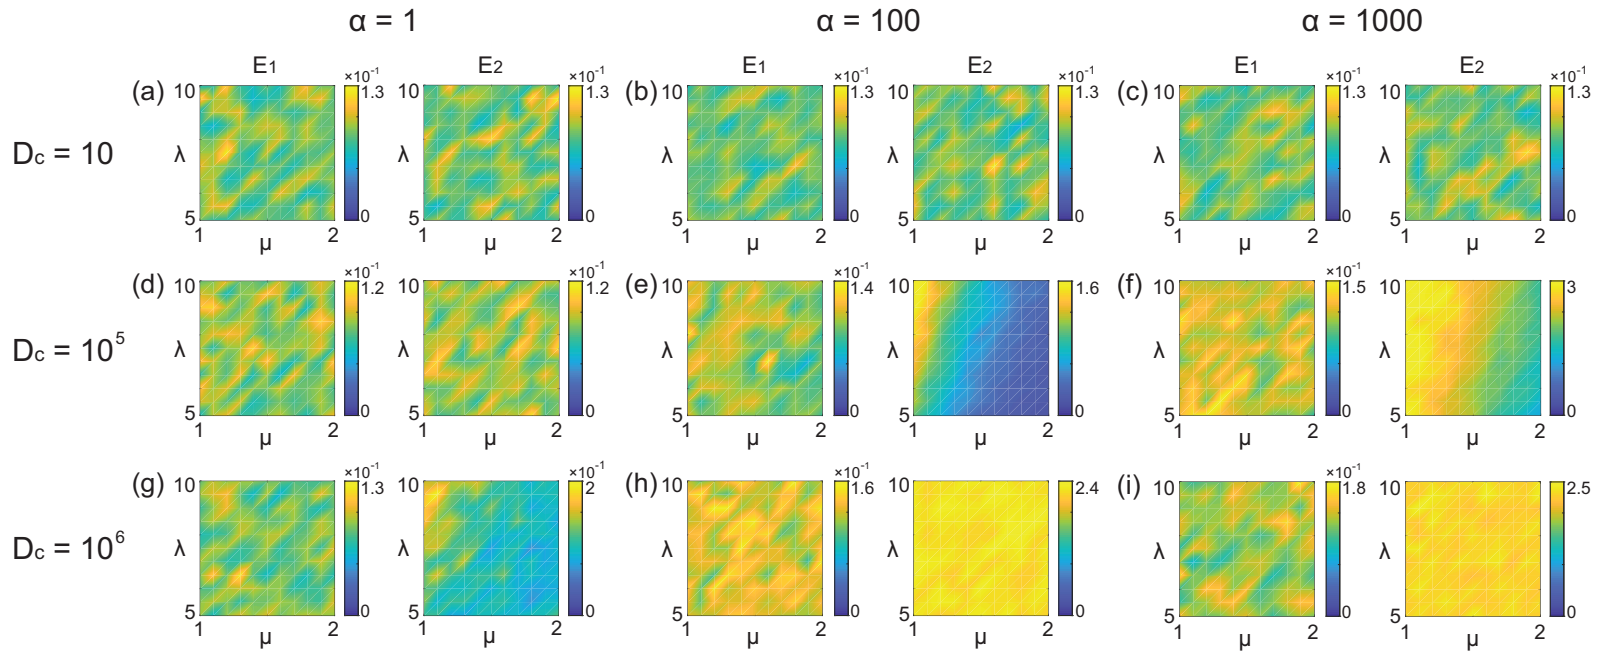

Fig. 7. Heat maps showing  $E_1(24; D_c, \alpha, \lambda, \kappa, \mu)$  and  $E_2(24; D_c, \alpha, \lambda, \kappa, \mu)$  for various choices of  $D_c$ ,  $\alpha$ ,  $\lambda$  and  $\mu$  with  $\kappa$  held constant at  $\kappa = 1$ . In all simulations we have  $\Delta = 20 \mu\text{m}$  and  $\tau = 0.01 \text{ h}$ .

## 417 6 Conclusion and Outlook

418 Typical mathematical models of cell migration stimulated by signalling molecules  
419 involve some kind of reaction–diffusion equation to explicitly describe the spa-  
420 tial and temporal distribution of the signalling molecules. However, such in-  
421 formation is rarely available from experimental observations since signalling  
422 molecules are challenging to record and image. Motivated by a suite of new co-  
423 culture cell migration assays, we develop new mathematical modelling tools to  
424 describe the cell migration regulated by signalling molecules in an attempt to  
425 avoid the need for working directly with a description of the spatial and tem-  
426 poral distribution of signalling molecules. We first develop a full discrete model  
427 that describes the migration and interactions of two subpopulations of cells, in  
428 which the movement of one subpopulation is regulated by the presence of sig-  
429 nalling molecules secreted by cells in the other subpopulation. In this model,  
430 the spatial and temporal distribution of the signalling molecules is governed  
431 by a discrete conservation statement that is related to a reaction–diffusion  
432 equation. To make this description consistent with experimental observations,  
433 we simplify the full discrete model by invoking a quasi–steady state assump-  
434 tion in the reaction–diffusion equation governing the spatial and temporal  
435 distribution of the signalling molecules. With this simplification, we obtain a  
436 reduced discrete model which implicitly describes a similar interaction between  
437 the two cell populations without needing to solve the underlying conservation  
438 statement. To provide additional mathematical insight into these two models  
439 we obtain continuum limit descriptions of both models, leading to new PDE  
440 models.

441 In the full discrete model we suppose that the migration rates of agents from  
442 Subpopulation 1 and Subpopulation 2 are given by functions  $f_1(C_i)$  and  $f_2(C_i)$ ,  
443 respectively, where  $C_i$  is the density of signalling molecules at site  $i$ . Similarly,  
444 in the reduced discrete model the migration rates of agents from Subpop-

445 ulation 1 and Subpopulation 2 are given by  $f_1(G_i)$  and  $f_2(G_i)$ , respectively,  
446 where  $G_i$  is the approximate density of signalling molecules at site  $i$ . Choosing  
447 particular functional forms for  $f_1$  and  $f_2$  allows us to specify whether cell mi-  
448 gration is stimulated or inhibited by the signalling molecule. We choose forms  
449 of  $f_1$  and  $f_2$  that are relevant to the hepatocyte–MSC co–culture experiments  
450 in Figure 2, and we compare the performance of the full discrete model and  
451 reduced discrete model for a typical experimental geometry, timescale, and  
452 parameter choices, and we focus on comparing the full and reduced models  
453 for different strengths of the chemokinesis effect. This comparison indicates  
454 particular situations where the reduced discrete model could be used in place  
455 of the full discrete model. In general we find that the reduced discrete model  
456 performs particularly well when the strength of chemokinesis is sufficiently  
457 small, whereas for sufficiently strong chemokinesis the comparisons indicate  
458 that the reduced model is not always a good approximation. Without making  
459 such comparisons, it is not obvious when it would be reasonable to use the  
460 reduced model.

461 There are several features of this study that could warrant further inves-  
462 tigation: (i) For simplicity, we focus on developing one–dimensional models  
463 to describe cell migration regulated by signalling molecules, and these one–  
464 dimensional models can be extended to two–dimensional geometries where  
465 necessary; (ii) In all comparisons we assume  $C_i = 0$  at  $t = 0$  in the full model  
466 description. This assumption is reasonable given that typical experiments do  
467 not provide any information about the spatial and temporal distribution of  
468 signalling molecules. If, instead, the initial distribution for  $C_i$  was known or  
469 measurable, all comparisons in this work could be repeated making use of that  
470 information; (iii) In this work we choose particular forms of  $f_1$  and  $f_2$  that are  
471 relevant to the hepatocyte–MSC co–culture experiments in Figure 2. Other  
472 choices of  $f_1$  and  $f_2$  could be made for different co–culture systems as rele-  
473 vant; and (iv) In the current modelling framework we assume that cells sense

474 signalling molecules locally, at the same site  $i$ . However, in the cell biology  
475 literature there have been different hypotheses put forward about non-local  
476 sensing over different spatial ranges (Hopkins and Camley 2019). Such non-  
477 local sensing could be introduced into our modelling framework by making  
478 appropriate adjustments to the discrete models and then examining how these  
479 changes manifest in the continuum limit description.

480 *Acknowledgments.* This work is supported by the Australian Research Coun-  
481 cil (DP170100474) and the National Health and Medical Research Council  
482 (APP1126091, APP1141121). WJ is supported by a QUT Vice-Chancellor’s  
483 Research Fellowship.

## 484 **References**

- 485 [1] Alarcón T, Byrne HM, Maini PK (2003) A cellular automaton model for tumour  
486 growth in inhomogeneous environment. *Journal of Theoretical Biology* 225:257-  
487 274.
- 488 [2] Balding D, McElwain DLS (1985) A mathematical model of tumour-induced  
489 capillary growth. *Journal of Theoretical Biology* 114:53-73.
- 490 [3] Behar TN, Li YX, Tran HT, Ma W, Dunlap V, Scott C, Barker JL (1996)  
491 GABA stimulates chemotaxis and chemokinesis of embryonic cortical neurons via  
492 calcium-dependent mechanisms. *Journal of Neuroscience* 16:1808-1818.
- 493 [4] Breward CJW, Byrne HM, Lewis CE (2002) The role of cell-cell interactions in a  
494 two-phase model for avascular tumour growth. *Journal of Mathematical Biology.*  
495 45: 125-152.
- 496 [5] Brumley DR, Carrara F, Hein AM, Yawata Y, Levin SA, Stocker R (2019)  
497 Bacteria push the limits of chemotactic precision to navigate dynamic chemical  
498 gradients. *Proceedings of the National Academy of Sciences* 116:10792-10797.

- 499 [6] Byrne HM, Cave G, McElwain DLS (1998) The effect of chemotaxis and  
500 chemokinesis on leukocyte locomotion: A new interpretation of experimental  
501 results. *Mathematical Medicine and Biology: A Journal of the IMA* 15:235-256.
- 502 [7] Byrne HM, Owen MR (2004) A new interpretation of the Keller-Segel model  
503 based on multiphase modelling. *Journal of Mathematical Biology* 49:604-626.
- 504 [8] Cai AQ, Landman KA, Hughes BD (2006) Modelling directional guidance and  
505 motility regulation in cell migration. *Bulletin of Mathematical Biology* 68:25-52.
- 506 [9] Chen Y, Corriden R, Inoue Y, Yip L, Hashiguchi N, Zinkernagel A, Nizet V,  
507 Insel PA, Junger WG (2006) ATP release guides neutrophil chemotaxis via P2Y2  
508 and A3 receptors. *Science* 314:1792-1795.
- 509 [10] Chung S, Sudo R, Mack PJ, Wan CR, Vickerman V, Kamm RD (2009) Cell  
510 migration into scaffolds under co-culture conditions in a microfluidic platform.  
511 *Lab on a Chip* 9:269-275.
- 512 [11] Das AM, Eggermont AM, Ten Hagen TL (2015) A ring barrier-based migration  
513 assay to assess cell migration *in vitro*. *Nature Protocols* 10:904-915.
- 514 [12] Flegg JA, Menon SN, Maini PK, McElwain DLS (2015) On the mathematical  
515 modeling of wound healing angiogenesis in skin as a reaction–transport process.  
516 *Frontiers in Physiology* 6:262.
- 517 [13] Frimberger D, Morales N, Gearhart JD, Gearhart JP, Lakshmanan Y  
518 (2006) Human embryoid body–derived stem cells in tissue engineering–enhanced  
519 migration in co-culture with bladder smooth muscle and urothelium. *Urology*  
520 67:1298-1303.
- 521 [14] Gruber HE, Somayaji S, Riley F, Hoelscher GL, Norton HJ, Ingram J, Hanley  
522 Jr EN (2012) Human adipose–derived mesenchymal stem cells: serial passaging,  
523 doubling time and cell senescence. *Biotechnic & Histochemistry* 87:303-311.
- 524 [15] Hillen T, Painter KJ (2009) A user’s guide to PDE models for chemotaxis.  
525 *Journal of Mathematical Biology* 58:183-217.
- 526 [16] Hopkins A, Camley BA (2019) Leader cells in collective chemotaxis: Optimality  
527 and trade-offs. *Physical Review E* 100:032417.

- 528 [17] Huang S, Brangwynne CP, Parker KK, Ingber DE (2005) Symmetry-breaking  
529 in mammalian cell cohort migration during tissue pattern formation: Role of  
530 random-walk persistence. *Cell Motility and the Cytoskeleton* 61:201-213.
- 531 [18] Jin W, Penington CJ, McCue SW, Simpson MJ (2016a) Stochastic simulation  
532 tools and continuum models for describing two-dimensional collective cell  
533 spreading with universal growth functions. *Physical Biology* 13:056003.
- 534 [19] Jin W, Shah ET, Penington CJ, McCue SW, Chopin LK, Simpson MJ (2016b)  
535 Reproducibility of scratch assays is affected by the initial degree of confluence:  
536 experiments, modelling and model selection. *Journal of Theoretical Biology*  
537 390:136-145.
- 538 [20] Jin W, Penington CJ, McCue SW, Simpson MJ (2017) A computational  
539 modelling framework to quantify the effects of passaging cell lines. *PLOS One*  
540 12:e0181941.
- 541 [21] Keller EF, Segel LA (1971) Model for chemotaxis. *Journal of Theoretical*  
542 *Biology* 30:225-234.
- 543 [22] Kirkpatrick B, Nguyen L, Kondrikova G, Herberg S, Hill WD (2010) Stability  
544 of human stromal-derived factor-1 $\alpha$  (CXCL12 $\alpha$ ) after blood sampling. *Annals of*  
545 *Clinical & Laboratory Science* 40:257-260.
- 546 [23] Kucia M, Jankowski K, Reza R, Wysoczynski M, Bandura L, Allendorf  
547 DJ, Zhang J, Ratajczak J, Ratajczak MZ (2004) CXCR4-SDF-1 signalling,  
548 locomotion, chemotaxis and adhesion. *Journal of Molecular Histology* 35:233-245.
- 549 [24] Liu Z, Klominek J (2004) Chemotaxis and chemokinesis of malignant  
550 mesothelioma cells to multiple growth factors. *Anticancer Research* 24:1625-1630.
- 551 [25] Luster AD (1998) Chemokines-chemotactic cytokines that mediate  
552 inflammation. *New England Journal of Medicine* 338:436-445.
- 553 [26] Mac Gabhann F, Popel AS (2004) Model of competitive binding of vascular  
554 endothelial growth factor and placental growth factor to VEGF receptors  
555 on endothelial cells. *American Journal of Physiology-Heart and Circulatory*  
556 *Physiology* 286:H153-H164.



- 557 [27] Mallet DG, de Pillis LG (2006) A cellular automata model of tumor-immune  
558 system interactions. *Journal of Theoretical Biology* 239:334-350.
- 559 [28] Murray JD (2002) *Mathematical Biology*, 3rd edn. Springer, Berlin.
- 560 [29] Novo E, Busletta C, di Bonzo LV, Povero D, Paternostro C, Mareschi K, Ferrero  
561 I, David E, Bertolani C, Caligiuri A, Cannito S, Tamagno E, Compagnone A,  
562 Colombatto S, Marra S, Fagioli F, Pinzani M, Parola M (2011) Intracellular  
563 reactive oxygen species are required for directional migration of resident and bone  
564 marrow-derived hepatic pro-fibrogenic cells. *Journal of Hepatology* 54:964-974.
- 565 [30] Painter KJ, Maini PK, Othmer HG (2000) Development and applications of a  
566 model for cellular response to multiple chemotactic cues. *Journal of Mathematical*  
567 *Biology* 41:285-314.
- 568 [31] Painter KJ, Sherratt JA (2003) Modelling the movement of interacting cell  
569 populations. *Journal of Theoretical Biology* 225:327-339.
- 570 [32] Pettet GJ, Byrne HM, McElwain DLS, J Norbury (1996) A model of wound  
571 healing angiogenesis in soft tissue. *Mathematical Biosciences* 136: 35-63.
- 572 [33] Pillay S, Byrne HM, Maini PK (2018) The impact of exclusion processes on  
573 angiogenesis models. *Journal of Mathematical Biology* 77:1721-1759.
- 574 [34] Richards GR, Millard RM, Leveridge M, Kerby J, Simpson PB (2004)  
575 Quantitative assays of chemotaxis and chemokinesis for human neural cells. *Assay*  
576 *and Drug Development Technologies* 2:465-472.
- 577 [35] Rosoff WJ, Urbach JS, Esrick MA, McAllister RG, Richards LJ, Goodhill GJ  
578 (2004) A new chemotaxis assay shows the extreme sensitivity of axons to molecular  
579 gradients. *Nature Neuroscience* 7:678-682.
- 580 [36] Sherratt JA, Sage EH, Murray JD (1993) Chemical control of eukaryotic cell  
581 movement: A new model. *Journal of Theoretical Biology* 162:23-40.
- 582 [37] Sherratt JA (1994) Chemotaxis and chemokinesis in eukaryotic cells: The  
583 Keller-Segel equations as an approximation to a detailed model. *Bulletin of*  
584 *Mathematical Biology* 56:129-146.

- 585 [38] Simpson MJ, Landman KA, Newgreen DF (2006) Chemotactic and diffusive  
586 migration on a non-uniformly growing domain: Numerical algorithm development  
587 and applications. *Journal of Computational and Applied Mathematics* 192: 282–  
588 300.
- 589 [39] Simpson MJ, Landman KA, Hughes BD, Fernando AE (2010) A model for  
590 mesoscale patterns in motile populations. *Physica A: Statistical Mechanics and  
591 its Applications*. 389: 1412–1424.
- 592 [40] Son K, Brumley DR, Stocker R (2015) Live from under the lens: Exploring  
593 microbial motility with dynamic imaging and microfluidics. *Nature Reviews  
594 Microbiology* 13:761-775.
- 595 [41] Stinner C, Tello JJ, Winkler M (2014) Competitive exclusion in a two-species  
596 chemotaxis model. *Journal of Mathematical Biology* 68:1607-1626.
- 597 [42] Tokoyoda K, Egawa T, Sugiyama T, Choi BI, Nagasawa T (2004) Cellular niches  
598 controlling B lymphocyte behavior within bone marrow during development.  
599 *Immunity* 20:707-718.
- 600 [43] Treloar KK, Simpson MJ, McElwain DLS, Baker RE (2014) Are *in vitro*  
601 estimates of cell diffusivity and cell proliferation rate sensitive to assay geometry?  
602 *Journal of Theoretical Biology* 356: 71-84.
- 603 [44] Veldkamp CT, Ziarek JJ, Su J, Basnet H, Lennertz R, Weiner JJ, Peterson  
604 FC, Baker JE, Volkman BF (2009) Monomeric structure of the cardioprotective  
605 chemokine SDF-1/CXCL12. *Protein Science* 18:1359-1369.
- 606 [45] Wright LM, Maloney W, Yu X, Kindle L, Collin-Osdoby P, Osdoby P (2005)  
607 Stromal cell-derived factor-1 binding to its chemokine receptor CXCR4 on  
608 precursor cells promotes the chemotactic recruitment, development and survival  
609 of human osteoclasts. *Bone* 36:840-853.
- 610 [46] Yoon D, Kim H, Lee E, Park MH, Chung S, Jeon H, Ahn CH, Lee K (2016)  
611 Study on chemotaxis and chemokinesis of bone marrow-derived mesenchymal  
612 stem cells in hydrogel-based 3D microfluidic devices. *Biomaterials Research* 20:25.
